1                                    **Stereotyped p53 binding tuned by chromatin accessibility**

2    **Antonina Hafner<sup>1,\*</sup>, Galit Lahav<sup>1,3</sup> and Jacob Stewart-Ornstein<sup>1\*</sup>**

3    <sup>1</sup>Department of Systems Biology, Harvard Medical School, Boston, MA 02115, USA

4    \*These authors contributed equally to this work

5    Corresponding author: [jacob\\_stewart-ornstein@hms.harvard.edu](mailto:jacob_stewart-ornstein@hms.harvard.edu)

6    <sup>2</sup>Antonina Hafner: [antonina@hms.harvard.edu](mailto:antonina@hms.harvard.edu)

7    <sup>3</sup>Galit Lahav: [galit\\_lahav@hms.harvard.edu](mailto:galit_lahav@hms.harvard.edu)

8

9    Keywords: p53, ChIPseq, Chromatin, DNA damage, Gene Expression

10

11

12

13

14

15

16

17

18

19

20 **Abstract**

21 Background

22 Transcription factors orchestrate the cellular response to stimuli by binding specifically to DNA and  
23 activating associated genes. In the DNA damage response, the tumor suppressor p53 regulates much of  
24 the transcriptional response and has been suggested to selectively regulate gene expression in different  
25 contexts. However, comparison between genome-wide studies shows a large overlap between p53 bound  
26 loci and thus questions this selectivity.

27 Results

28 To systematically assess the cell type specificity of p53, we directly measured its association with DNA in  
29 12 p53 wild-type cell lines in response to ionizing radiation. We found that the vast majority of bound  
30 sites are occupied across all cells lines uniformly. Gene expression, on the other hand showed substantial  
31 variability between cell lines. The coherence of our dataset, allowed us to identify a small subset of  
32 binding sites that appeared in just one or a few cell lines. We found that intrinsic chromatin accessibility  
33 of a cell line explained these differential p53 binding preferences. Moreover, we were able to manipulate  
34 p53 binding by altering chromatin state.

35 Conclusion

36 Our results show the limited contribution of genomic sequence to p53 binding and suggest that in vivo  
37 factors including chromatin accessibility largely regulate its binding.

38

39

40

## 41 **Background**

42 Transcription factors (TF) are a large family of proteins that can bind to DNA and induce or repress  
43 transcription of genes [1]. Substantial effort, notably through the ENCODE project, has gone into  
44 generating genome wide maps of TF-DNA associations, gene expression and chromatin states. These  
45 genome wide datasets have been used to identify gene regulatory networks that allow cell type and  
46 stimulus-specific gene expression and led to characterization of a handful of networks, as for example in  
47 the embryonic stem cells system [2, 3]. However, these studies have also revealed the complexity of gene  
48 regulation and the large space of combinatorial interactions between TFs [4, 5]. Identifying the  
49 mechanisms that allow tissue and stimulus-specific gene expression remains a challenge and an active  
50 field of research.

51 In this work, we explored cell type and stimulus specificity of the tumor suppressing transcription factor  
52 p53 at the level of DNA binding and regulation of gene expression. The major DNA damage response (DDR)  
53 regulator in mammals, p53 is necessary and sufficient to impose terminal cell fates on irradiated cells.  
54 Though ubiquitously expressed across human tissues, it remains unclear if p53 DNA binding is universal,  
55 which could be advantageous for a critical stress response system, or shaped by the chromatin and  
56 cofactor environment of different cell types and lineages. Context specific regulation of gene expression  
57 by p53 has been a long standing hypothesis in the p53 field, and implies that p53 can integrate information  
58 about cellular context and the type of stress to selectively activate some target genes versus others [6-9].  
59 However, studies querying p53 binding genome wide in different human cell lines and upon different  
60 treatments have variously found strong agreement in p53 binding locations [10, 11] and activation of a  
61 core set of target genes [12]. Other studies have argued for unique cell type or transformation status  
62 specific p53 activity [13-15]. These studies compared pairs of cell lines or supplemented single cell line  
63 data with meta-analysis of published datasets, an approach that is powerful for identifying universal p53

64 binding sites, but has limits for detection of cell line specific binding patterns due to divergent  
65 experimental conditions across datasets.

66 To study how p53 binding varies across cell lines, we measured p53 DNA binding in 12 cell lines from  
67 different tissue types in response to a single treatment. Indeed, we took advantage of our previous  
68 characterization of these cell lines which showed a comparable acute response of p53 [16] in response to  
69 ionizing radiation (IR). By treating this panel of epithelial cell lines with a dose of IR sufficient to induce  
70 uniform p53 activation across cell lines, and measuring p53 binding at an early (2 hours) time-point we  
71 minimized secondary effects and focused on measuring the rapid and direct binding of p53. Our approach  
72 differs from the majority of p53 datasets in the literature, which use chemotherapy agents such as  
73 doxorubicin or the p53 activator Nutlin3A at later time-points of 6-12 hours. This coherent set of samples  
74 allowed us to rigorously explore the heterogeneity of p53 binding and identify the influence of universal  
75 genomic and cell line specific chromatin factors on p53 binding and gene expression.

## 76 **Results**

### 77 **p53 binding across the genome is stereotyped between cell lines and treatments**

78 To study how p53 binding varies across cell lines we treated a set of 12 cell lines expressing wild type p53  
79 with ionizing radiation (IR; X-Ray 4Gy) to induce p53 activity and 2 hours later cross-linked and harvested  
80 each cell line for ChIP-Seq analysis. Well established p53 target genes showed robust binding in all 12 cell  
81 lines (Fig. 1A). Overall, by pooling data from all cell lines we confidently called ~9000 p53 ChIP peaks. *De*  
82 *novo* motif analysis identified a motif bearing strong similarity to previously identified p53 binding motifs  
83 as the strongest single motif and also found it to be centrally enriched within peaks (Fig. 1B).

84 The quantitative strength of p53 binding at each genomic locus was highly conserved across the 12 cell  
85 lines (Fig. 1C). Though no strong groups of cell lines appeared by eye, hierarchical clustering correctly  
86 sorted the cell lines by tissue of origin, with pairs of lung and kidney lines, and all five melanoma lines

87 clustering together (Fig. 1C). These p53 bound regions were also similar to other published datasets  
88 (average within dataset correlation 0.53, average correlation to external datasets 0.49; Fig. S1) and  
89 consistent with previous work on p53 binding locations [10]. It was previously suggested that cancer cell  
90 lines show a different p53 binding profile from non-cancerous cells [13]. We therefore compared the 12  
91 cancer cell lines to an identically treated non-transformed line, RPE1. We found that p53 binding at  
92 identified sites in RPE1 cells in response to IR was highly correlated with our dataset in transformed cell  
93 lines (Fig. 1D; average  $R=0.48$  for correlation (RPE, Cancer Lines) vs  $0.53$  for correlation (Cancer, Cancer)).  
94 To further explore if the apparent uniformity of p53 binding is specific to IR, we compared p53 ChIP peaks  
95 in MCF7 and UACC257 cell lines treated with either IR or the p53 activator Nutlin3A. We observed  
96 condition-condition correlations within each line that were stronger than any line- line correlations (Fig.  
97 1E;  $R=0.87$  or  $0.88$  for MCF7 and UACC257, respectively, vs  $R=0.73$  for the maximum line-line). Thus in  
98 addition to the uniformity we observe between cell lines, IR induced and pharmacologically induced p53  
99 do not lead to distinct p53 function as measured by acute p53 DNA binding.

#### 100 **Genomic DNA sequence has limited predictive power for p53 binding**

101 Given the strong conservation of p53 binding across cell lines we hypothesized that p53 binding might be  
102 largely determined by genomic DNA sequences. We tested this by comparing motif scores (calculated  
103 from the position weight matrix) with p53 ChIP-Seq signal intensity. The extent of the correlation between  
104 p53 binding and PWM score was highly cell line dependent (Fig. 2A), ranging from no correlation to  
105 correlation of  $0.22$  in a single cell line. Averaging p53 binding over increasing numbers of cell lines resulted  
106 in better agreement between genomic motif score and p53 binding, with the highest correlation of  $0.26$   
107 averaged across all datasets (Fig. 2 A,B). Therefore, although the motif score significantly correlates with  
108 p53 DNA binding ( $p=1.98e-132$ ), it only allows to account for slightly more than 5% of the variance.

109 One possible explanation for why the p53 motif only had modest predictive power was the presence of  
110 binding elements in the DNA that were not well accounted for by a PWM. It has been proposed, for  
111 example, that flanking nucleotide identity and also general ‘DNA shape’ features of the binding site might  
112 influence binding site choice [17, 18]. To explore if our motif analysis was simply a poor model of p53  
113 binding we performed an *in vitro* CHIP experiment where recombinant p53 was incubated with  
114 fragmented genomic, followed by immunoprecipitation and deep sequencing similarly to a recently  
115 published protocol [19]. As this assay uses sheared genomic DNA with a size of ~300-600bp factors such  
116 as flanking nucleotides and DNA shape should be appropriately measured. Performing this assay, we  
117 obtained a strong signal of p53 binding, recovering a consensus p53 motif (1e-2422, Fig 2C). We observed  
118 p53 binding sites, such as the one proximal to the CDKN1A/p21 promoter, that showed strong *in vivo*  
119 binding, a strong motif, and substantial *in vitro* p53 binding signal (Fig. 2D). Whereas, other binding sites  
120 such as the one contained in the first intron of MDM2 showed substantial *in vivo* binding, but little *in vitro*  
121 binding (and no strong motif). Other sites such as one in the MDM4 gene showed strong *in vitro* binding  
122 (and a strong motif), but little *in vivo* binding. Overall, the *in vitro* p53 binding signal did not show a better  
123 correlation ( $R=0.252$ ,  $P= 3.10e-127$ , Fig. 2E) with *in vivo* p53 binding than the motif score. These results  
124 suggest that factors other than just DNA sequence determine p53 binding *in vivo*.

### 125 **A subset of p53 binding sites is highly variable**

126 To see if we could identify what factors regulate p53 binding *in vivo* we looked for binding sites that were  
127 variably occupied across cell lines, with the reasoning that perhaps by understanding cell line-cell line  
128 variation in binding would give a clue to *in vivo* regulators of p53 binding. We compared the cell line to  
129 cell line variability in p53 peak height, correcting for the average peak height (which contributes shot noise  
130 to our analysis), and identified about 5% of binding sites (494 peaks) that showed high variation between  
131 cell lines relative to their average peak strength (Fig. 3A, B). For example, p53 peaks nearby the  
132 inflammatory associated genes IL1A and CXCL1 showed clear p53 binding in the LOXIMVI line, weaker

133 association in the UO31 and H460 lines, and no binding in other cell lines (Fig. 3B). We also found  
134 variability in p53 binding at the promoters of previously reported p53 target genes, ALDH3A1 and EPHA2,  
135 ranging from no binding in some cell lines to strong peaks in others (Fig. 3B). *De novo* motif search on this  
136 set of variable peaks identified the p53 binding site as the most significantly enriched motif (HOMER,  
137  $p=1.0e-46$ ), suggesting that these sites represent direct p53 binding events.

138 To determine if these highly variable binding sites had novel cell line specific functions, we assigned each  
139 peak to its closest gene (with a 10 kb cutoff) and clustered the resulting 218 peaks on their p53 binding.  
140 We found that most cell lines showed a few unique p53 binding sites, but without strong clustering which  
141 would sort the lines into groups (Fig. 3C) as in Fig. 1C. Enrichment analysis identified  
142 inflammatory/chemotaxis associated genes as being enriched in these highly variable p53 bound genes.  
143 The cell line LOXIMVI showed particularly strong enrichment for p53 binding to inflammatory genes  
144 including IL1A, IL1B, CLL20, and CXCL1 genes, although UO31 also showed substantial binding for many of  
145 these targets. We also observed, that in the estrogen receptor (ER) positive MCF7 breast cancer cell line,  
146 several unique binding sites overlapped with ESR1 (estrogen receptor) binding sites, including TFF1,  
147 IGFBP4, and PRLH. These results suggest that the non-uniformities in p53 binding we observed may be  
148 linked to cell line specific regulatory programs.

#### 149 **p53 binding correlates with basal gene expression**

150 To explore the connection between cell line specific p53 binding and gene expression, we collected RNA  
151 sequencing data from each cell line in the basal, untreated state and 3 hours after IR. In contrast to the  
152 uniformity of p53 binding, we saw substantially different gene expression programs in response to IR  
153 across cell lines. Focusing on established p53 target genes [12] (list of target genes provided in  
154 Supplement), we found that while some canonical p53 target genes were universally activated, others  
155 showed more variable activation after IR. Notably, while CDKN1A/p21 showed fairly uniform induction in

156 all cell lines, MDM2 and BBC3/Puma showed variable activation despite having conserved p53 binding  
157 (Fig. 4A; Fig. 1A). More generally, there was substantial variation in the activation of p53 targets after IR  
158 (Fig. 4B, 77 genes). However we found that, cell lines originating from the same tissue were highly  
159 correlated in their gene expression response to IR. For example, the two lung cancer cell lines (A549 and  
160 H460) showed a correlation of  $R=0.90$  in their p53 target gene response to IR (Fig. 4C) compared to low  
161 or even negative correlation, between other cell line pairs as for example UO31 and H460 ( $R=-0.49$ , Fig.  
162 4B,C).

163 We next asked if differential p53 binding could explain this variation in IR induced gene expression in  
164 different cell lines. Quantitative variation in p53 binding was essentially uncorrelated (median  $R=0.01$ ) to  
165 the induction of p53 target genes after IR (Fig. 4D). However, for the highly variable p53 bound genes  
166 (Fig. 2C), p53 binding was correlated with basal gene expression ( $p=1.9e-31$ , t-test; Fig. 4D, E). Taken  
167 together, these results suggest that while the transcriptional response of cell lines to IR is diverse,  
168 relatively little of this diversity is explained by p53 binding site occupancy. Conversely, basal gene  
169 expression appears to correlate with the ability of p53 to bind to a subset of genes.

#### 170 **Cell line specific chromatin accessibility accounts for variability in p53 binding sites**

171 Given our observation that basal gene expression correlated with cell line specific p53 binding events, we  
172 wondered if the p53 peaks specific to some cell lines can be attributed to increased chromatin accessibility  
173 in these lines. It has been suggested that p53 can act as a pioneer factor with a high affinity for histone  
174 occupied regions [20-22], whereas others have shown that p53 binds readily in open regions [23, 24]. Our  
175 results linking basal expression of nearby genes to p53 binding suggest that the 'openness' of the genomic  
176 region might influence p53 binding. To study this we focused on the LOXIMVI cell line, which showed  
177 strong, and unique binding of p53 nearby inflammatory related genes and the MCF7 cell line, which  
178 showed p53 binding at estrogen receptor associated genes, and for which DNase accessibility data was



179 available. We performed a modified ATAC-Seq protocol using the MuA transposase to generate genome  
180 wide maps of accessible regions in the MCF7 and LOXIMVI cell lines. We note that in this context the MuA  
181 transposition occurs in a 5min 30C step, a potential advantage over the more conventional TN5 approach  
182 that requires a 30min 37C incubation. Our ATAC-Seq data and ENCODE produced DNase sensitivity data  
183 from MCF7 showed strong overlap with greater than 90% of ATAC-Seq peaks being DNase accessible [25].  
184 We compared our ATAC-Seq data to the p53 ChIP-Seq signal for the inflammatory genes that showed p53  
185 binding in LOXIMVI but not in MCF7, and observed strong ATAC-Seq signal only in the LOXIMVI cell line  
186 (Fig. 5A), consistent with increased accessibility at these loci leading to stronger p53 binding. Conversely,  
187 GREB1, a breast cancer associated gene showed only p53 binding and ATAC-Seq sensitivity in the MCF7  
188 cell line (Fig. 5A). Genome wide the difference in ATAC-Seq signal between the two lines accounted for  
189 just over 22% of the variance in p53 binding between the two datasets ( $R^2=0.225$ ; Fig 5B). More generally,  
190 as has been observed for other transcription factors [26], combining accessibility and motif scoring allows  
191 for improved prediction of DNA binding. Indeed, accessibility and motif score accounted for 13.8% and  
192 20.9% of the variance in the  $\log_2(\text{p53 ChIP-Seq peak signal})$  for MCF7 and LOXIMVI respectively, compared  
193 to ~5% with the motif alone. We therefore conclude that chromatin accessibility favors p53 binding and  
194 accounts for a substantial fraction of the cell line specific gain of p53 DNA binding sites between MCF7  
195 and LOXIMVI cells. Interestingly, we also found that genome wide chromatin accessibility was negatively  
196 correlated with *in vitro* p53 binding ( $R=-0.2$ ,  $p=2.1e-80$ , MCF7 ATAC-Seq vs. *in vitro* binding), suggesting  
197 that many strong p53 binding sites are obscured by local chromatin context.

198 To explore if, within a single cell line, perturbations to accessibility could alter p53 binding we treated  
199 MCF7 cells with decitabine, a demethylase inhibitor that has been shown to broadly alter chromatin  
200 structure [27]. We then treated these cells with IR and performed p53 ChIP-Seq and ATAC-Seq on the  
201 samples. Comparing p53 binding between the decitabine treated and untreated cells, we observed  
202 minimal alterations in p53 binding (Fig. 5C). Indeed, we found only one binding site, adjacent to the

203 DLGAP5 gene, that showed a substantial change in p53 binding (Fig. 5D). This increase in p53 binding was  
204 accompanied by increased accessibility (Fig. 5D). The DLGAP5 binding site has a consensus p53 motif and  
205 showed occupancy in other cell lines such as UACC62 (Fig. 5D), consistent with this binding site being  
206 obscured by chromatin in wild type MCF7 cells. Computing across p53 binding sites genome-wide, there  
207 was a modest but significant correlation between change in chromatin accessibility and change in p53  
208 DNA binding between decitabine treated and untreated samples ( $R=0.16$ ,  $p=3.99e-13$ ).

## 209 **Discussion**

210 The transcription factor p53 regulates the cellular response to DNA damage, including up regulating  
211 repair, cell cycle arrest and apoptotic proteins. The nature, strength, and balance between the DNA repair  
212 and cell death arms of p53 signaling varies across tissues in the body [6, 16, 28], and can be modified by  
213 drug treatment [29, 30] and genetic perturbation [31]. The role of the p53 itself in this decision making is  
214 controversial, with arguments for p53 behaving as a smart ‘signal integrator’ (reviewed in [8]) or a simple  
215 effector [10]. We sought to understand the role of p53 in diverse cell lines by focusing on p53 DNA binding  
216 and gene expression in response to ionizing radiation.

217 As other studies have suggested, p53 DNA binding does not greatly vary across cell lines or treatments.  
218 However, we did find that p53 binding could group cell lines by their tissue of origin, suggesting some  
219 degree of tissue specificity. Further, we noted a modest, but significant correlation between the strength  
220 of p53 binding (measured by ChIP-Seq) and the predicted strength of p53 association (using the PWM  
221 model). This correlation varied across cell lines and was strongest in the pooled dataset containing all cell  
222 lines. More strikingly, we observed a similar correlation when comparing genome wide *in vitro* association  
223 of p53 with *in vivo* p53 binding. These results suggest that the PWM motif is a relatively accurate measure  
224 of p53 binding affinity, and that flanking regions or other DNA features do not greatly improve p53 binding  
225 prediction. In general, p53 binding at any given location in the genome was relatively poorly predicted by

226 either *in vitro* binding or motif analysis suggesting that *in vivo* factors greatly contribute to p53 binding  
227 specificity.

228 Taking advantage of the coherence of our dataset we identified p53 binding sites that were variably  
229 occupied across cell lines. This subset of peaks were nearby genes enriched for specific cellular programs,  
230 most notably the inflammatory response in the melanoma LOXIMVI cell line and ER specific response in  
231 the MCF7 cell line. Our ATAC-Seq data showed that this differential p53 binding could be substantially  
232 explained by chromatin accessibility in the MCF7 and LOXIMVI cell lines we examined. Globally, our data  
233 showed that a higher degree of chromatin accessibility favored p53 binding and is consistent with a  
234 previous report showing that open chromatin can provide a permissive environment for p53 [21] as well  
235 as other transcription factors such as GR [32] for example. We tested this prediction by using a  
236 pharmacological agent to modify p53 chromatin state and observed increased accessibility around the  
237 DLGAP5 gene that correlated with increased p53 binding.

238 Looking at gene expression of p53 bound genes, we observed no direct correlation between variation in  
239 p53 binding and induction of gene expression. This suggests that although p53 binding is required for the  
240 DNA damage response, the extent and mode of the IR gene expression response, is dictated by other  
241 factors than p53 binding itself. We recently showed that mRNA stability of direct p53 target genes can  
242 lead do differences in the timing and level of expression [33]. Further studies coupling chromatin  
243 accessibility, p53 binding, post-translational modifications, and measurements of RNA synthesis and  
244 degradation rates will be required to reconcile these observations and identify what features tune the  
245 cellular response to DNA damage in different cellular backgrounds.

## 246 **Conclusions**

247 We found that the vast majority of p53 binding events as universal across cancerous and non-cancerous  
248 cell lines, with strong quantitative agreement in binding magnitude. We further found that Nutlin3A

249 treatment resulted in a nearly identical set of p53 binding events as IR, emphasizing the universality of  
250 these binding sites. These binding sites were not, however, well predicted by the local genomic sequence.  
251 We identified a set of variable p53 binding events (~5%) present in only one or a handful of cell lines.  
252 These binding events were often in the vicinity of transcriptionally active genes and correlated strongly  
253 with cell line specific chromatin accessibility. Consistent with this, pharmacological modification of  
254 chromatin state could modify p53 binding. Interestingly, we did not find a strong correlation of p53 DNA  
255 binding to the transcriptional response to IR, suggesting additional layers of transcriptional control.  
256 Overall we found that the acute activation and binding of p53 to DNA in response to damage is highly  
257 stereotyped, with modest tuning by the chromatin environment.

## 258 **Methods**

### 259 General genomic analysis

260 All DNA reads were single end Illumina reads and were aligned to HG19 genome build using bowtie [34].  
261 Aligned reads were further processed using HOMER (V4.6, [35]) to assemble tag files and call peaks. Peak  
262 locations and tag files were read by custom Matlab code (Mathworks) which was used to integrate the  
263 different datasets/types. For each ChIP-Seq dataset the number of reads in p53 peaks were normalized  
264 to the average of all cell lines, and for subsequent analyses and comparisons, peaks with less than 2  
265 normalized counts were discarded. Clustering and comparison was based on Pearson correlations  
266 between p53 binding signals. RNA data was aligned to hg19 and the Refseq HG19 transcriptome using  
267 Tophat, CuffQuant, and CuffMerg [36]. Most computation was done on the Harvard Medical School  
268 cluster (Orchestra). Genomic binding and signals were visualized using the UCSC genome browser [37].  
269 Motif analysis was performed in Matlab on the Hg19 genome using a ChIP-Seq derived PWM adjusted to  
270 have a minimum probability of each nucleotides occurrence.

### 271 ATAC-Seq

272 ATAC seq was performed as described [38], with the major exception of the use of a MuA transposase  
273 (Thermo) rather than the TN5 transposase. Briefly, MCF7 or LOXIMVI cells were trypsinized and 50K cells  
274 spun down, washed once with PBS, and lysed with a hypotonic buffer containing 0.1% NP-40, and spun  
275 down to generate a crude nuclei pellet. This pellet was transposed in a 30 $\mu$ l volume using MuA (0.7 $\mu$ l),  
276 MuA buffer (10 $\mu$ l), and H<sub>2</sub>O (19 $\mu$ l) for 5min at 30C. The sample was treated with 3 $\mu$ l stop solution, and  
277 incubated at 30C for a further minute. The sample was then collected and purified by addition of 45 $\mu$ l of  
278 SPRI beads (Aline Biosciences). The purified sample was PCR amplified in two steps to add barcoded  
279 adaptors suitable for Illumina sequencing. Samples were sequenced with single end 75bp reads on an  
280 Illumina NextSeq. Reads (>30M) were trimmed to remove adaptors with cutadapt [39], aligned to the  
281 genome with Bowtie, and analyzed with Matlab. Genomic DNA (50ng) from MCF7 and LOXIMVI was  
282 transposed, amplified and sequenced in parallel to estimate background.

### 283 ChIP-Seq

284 Briefly, 10M cells were treated with 4Gy IR (RS-2000, RadSource) and 2hrs later were fixed by addition of  
285 1% paraformaldahyde (Alfa Aesar) at room temperature for 10 minutes with agitation. Fixation was  
286 stopped by addition of 250mM glycine. Cells were scraped and flash frozen. Cell pellets were thawed in  
287 hypotonic lysis buffer and spun to generate a crude nuclei prep. These nuclei were lysed in a SDS buffer  
288 and sonicated (Bioruptor) to fragment DNA. Fragmented DNA was diluted in IP buffer and agitated  
289 overnight with 2mg/ml DO-1 (anti-p53, Santa Cruz). 20 $\mu$ l of protein A magnetic beads (Invitrogen) were  
290 used to isolate the p53 associated fragments and samples were washed with low salt, high salt, and LiCl  
291 buffers. DNA was eluted from beads with an SDS/NaCO<sub>3</sub> buffer and was decross-linked at 65C for 6hrs in  
292 a high salt buffer. ChIP libraries were constructed with the commercial NEBnext kit (NEB) and associated  
293 protocols, although reaction volumes were reduced by 4 fold and custom adaptors and barcodes were  
294 employed. Libraries were sequenced with single end 75bp reads on Illumina NextSeq.

295 Reads were aligned to the genome with Bowtie1.1 [34], and analyzed with HOMER [35], MACS2 [40] and  
296 custom Matlab scripts. Peak calling was done after pooling reads from ChIP-Seq experiments in all cell  
297 lines. The final set of peaks represented the consensus of HOMER (default settings) and MACS2 (using the  
298 q 0.01 threshold) identified peaks, and was filtered to remove ENCODE black-list locations. The number  
299 of reads within each peak region was computed from HOMER tag files using custom Matlab scripts.  
300 Background regions around each peak were subtracted from peak scores to correct for high background  
301 regions. The HOMER package [35] was used for *de novo* motif discovery. WebLogo was used to generate  
302 the motif plot [41] in (Figs. 1B, 2C) for the top enriched motif. The top enriched motif (Fig. 1B) was then  
303 used to re-scan and score all peaks and background regions. Background regions were generated by  
304 selecting 500bp regions adjacent to either side of the peak and excluding regions that overlap with p53  
305 peak regions. Clustering of peaks was accomplished using a correlation distance metric and average  
306 linkage in Matlab.

### 307 *In vitro* ChIP-Seq

308 To generate recombinant p53 we in vitro transcribed/translated human p53 with a c-terminal HA tag using  
309 a rabbit reticulocyte system (Promega). To generate fragmented genomic DNA we tagged 50ng of  
310 human genomic DNA from MCF7 cells using the MuSeq kit (Thermo) and amplified it using PCR and custom  
311 adaptor primers for 8 cycles. DNA was cleaned up on SPRI beads (Aline Biosciences) and quantified. At  
312 room temperature 20ng of DNA and recombinant p53 (0.1uM final) were combined in a binding buffer  
313 (10mM TRIS, 5mM MgCl<sub>2</sub>, 10% glycerol, 1mM DTT) and incubated at room temperature for 30 min. The  
314 mixture was diluted 2 fold (to 20ul) and 1.5ul of anti-HA antibody was added (Rockland) and the sample  
315 incubated at 4C overnight with shaking. A 1:1 mixture of magnetic proteinA/proteinG beads was added  
316 (sigma) and incubated at 4C for 1hr with shaking. The beads were then washed 3x with washing buffer  
317 (10mM Tris, 5mM HCL, 0.1% triton, 150mM NaCl) and DNA eluted with elution buffer (1%SDS, 100mM  
318 Na<sub>2</sub>CO<sub>3</sub>) at 37C for 15 minutes. Samples were cleaned up, and adaptors and barcodes added by PCR.

319 Reads (>30M) were trimmed to remove adaptors with cutadapt [39], aligned to the genome with Bowtie,  
320 and analyzed with Matlab.

### 321 RNA-Seq

322 For each cell line 50,000 cells were plated in 35 mm dishes, 24hrs later cells were treated (or not) with  
323 4Gy IR (RS-2000, RadSource), 3hrs after that cells were lysed with Trizol (Ambion). RNA was purified on  
324 affinity columns and DNase treated (Zymo). Purified RNA (500ng) was polyA purified using magnetic  
325 beads (NEB), fragmented and reverse transcribed using protoscript RT (NEB), second strand synthesized  
326 (NEB), and then assembled into libraries with the commercial NEBnext kit (NEB) and associated protocols,  
327 although reaction volumes were reduced by 4 fold and custom adaptors and barcodes were employed.  
328 Libraries were sequenced with single end 75bp reads on a NextSeq. Reads were aligned to the  
329 genome/transcriptome with Bowtie/Tophat and analyzed with custom Matlab scripts.

### 330 Cell Culture and Cell Treatment

331 Parental cell lines were obtained from ATTC, with the exception of the RPE cells which were a gift from  
332 Prof. Steve Elledge (Harvard Medical School), and were thawed and propagated in RPMI (GIBCO) with 5%  
333 FBS. All experiments were performed in this media. All media was supplemented with 1% antibiotic and  
334 antimycotic (Corning). Treatment with Nutlin3A (sigma) was at 5uM. X-ray induced DNA damage was  
335 generated with a RS-2000 source (RadSource, 160KeV). MCF7 cells were treated with 2uM (5-AZA-2'-  
336 deoxycytidine, MP Biomedicals) for 5 days, cells were split on day 2, replated in decitabine containing  
337 media. Treated and untreated cells were then further treated with IR or not as with other samples.

### 338 Public datasets

339 Raw fastq datasets were downloaded from the Sequence Read Archive (see supplement). These datasets  
340 were all single end Illumina reads and were aligned to the HG19 genome with using the same pipeline as

341 described above for our ChIP-Seq samples, and further analyzed with HOMER to generate tag files.

342 Custom Matlab code was used to compare these datasets to our ChIP-seq data.

343 **Declarations**

344 Ethics approval and consent to participate

345 Not Applicable.

346 Consent for publication

347 Not Applicable

348 Availability of data and material

349 All sequencing data has been deposited in NCBI's Gene Expression Omnibus under accession number

350 GSE100292. Data is also available as UCSC tracks as a custom session accessible at:

351 <https://genome.ucsc.edu/cgi->

352 [bin/hgTracks?hgS\\_doOtherUser=submit&hgS\\_otherUserName=jacobso&hgS\\_otherUserSessionName=H](https://genome.ucsc.edu/cgi-bin/hgTracks?hgS_doOtherUser=submit&hgS_otherUserName=jacobso&hgS_otherUserSessionName=H)

353 [afner\\_et\\_al\\_hg19](https://genome.ucsc.edu/cgi-bin/hgTracks?hgS_doOtherUser=submit&hgS_otherUserName=jacobso&hgS_otherUserSessionName=H)

354 Competing interests

355 The authors declare no conflicts of interest.

356 Funding

357 AH was supported by a Boehringer Ingelheim Fonds PhD fellowship. This study was supported by NIH

358 grants GM083303 and CA207727 (J.S-O).

359 Authors' contributions



360 JSO and AH initiated and conceived the study; JSO and AH collected and analyzed the data; AH, JSO and  
361 GL wrote the paper, JSO and GL supervised the study.

362 Acknowledgements

363 We thank Megha Padi and all members of the Lahav lab for feedback. We thank the Bauer sequencing  
364 core and Christian Daly for sequencing support and HMS research computing for maintaining the  
365 Orchestra cluster.

366

367

368

369

370

371

372

373

374

375 **References**

- 376 1. Vaquerizas, J.M., et al., *A census of human transcription factors: function, expression and*  
377 *evolution*. Nat Rev Genet, 2009. **10**(4): p. 252-63.
- 378 2. Chen, X., et al., *Integration of external signaling pathways with the core transcriptional network*  
379 *in embryonic stem cells*. Cell, 2008. **133**(6): p. 1106-17.

- 380 3. Boyer, L.A., et al., *Core transcriptional regulatory circuitry in human embryonic stem cells*. Cell,  
381 2005. **122**(6): p. 947-56.
- 382 4. Gerstein, M.B., et al., *Architecture of the human regulatory network derived from ENCODE data*.  
383 Nature, 2012. **489**(7414): p. 91-100.
- 384 5. Garber, M., et al., *A high-throughput chromatin immunoprecipitation approach reveals principles  
385 of dynamic gene regulation in mammals*. Mol Cell, 2012. **47**(5): p. 810-22.
- 386 6. Fei, P., E.J. Bernhard, and W.S. El-Deiry, *Tissue-specific induction of p53 targets in vivo*. Cancer Res,  
387 2002. **62**(24): p. 7316-27.
- 388 7. Brady, C.A. and L.D. Attardi, *p53 at a glance*. J Cell Sci, 2010. **123**(Pt 15): p. 2527-32.
- 389 8. Kruiswijk, F., C.F. Labuschagne, and K.H. Vousden, *p53 in survival, death and metabolic health: a  
390 lifeguard with a licence to kill*. Nat Rev Mol Cell Biol, 2015. **16**(7): p. 393-405.
- 391 9. Aylon, Y. and M. Oren, *The Paradox of p53: What, How, and Why?* Cold Spring Harb Perspect Med,  
392 2016. **6**(10).
- 393 10. Verfaillie, A., et al., *Multiplex enhancer-reporter assays uncover unsophisticated TP53 enhancer  
394 logic*. Genome Res, 2016. **26**(7): p. 882-95.
- 395 11. Nikulenkov, F., et al., *Insights into p53 transcriptional function via genome-wide chromatin  
396 occupancy and gene expression analysis*. Cell Death Differ, 2012. **19**(12): p. 1992-2002.
- 397 12. Fischer, M., *Census and evaluation of p53 target genes*. Oncogene, 2017.
- 398 13. Botcheva, K., et al., *Distinct p53 genomic binding patterns in normal and cancer-derived human  
399 cells*. Cell Cycle, 2011. **10**(24): p. 4237-49.
- 400 14. Smeenk, L., et al., *Role of p53 serine 46 in p53 target gene regulation*. PLoS One, 2011. **6**(3): p.  
401 e17574.

- 402 15. Akdemir, K.C., et al., *Genome-wide profiling reveals stimulus-specific functions of p53 during*  
403 *differentiation and DNA damage of human embryonic stem cells*. *Nucleic Acids Res*, 2014. **42**(1):  
404 p. 205-23.
- 405 16. Stewart-Ornstein, J. and G. Lahav, *p53 dynamics in response to DNA damage vary across cell lines*  
406 *and are shaped by efficiency of DNA repair and activity of the kinase ATM*. *Sci Signal*, 2017.  
407 **10**(476).
- 408 17. Gordan, R., et al., *Genomic regions flanking E-box binding sites influence DNA binding specificity*  
409 *of bHLH transcription factors through DNA shape*. *Cell Rep*, 2013. **3**(4): p. 1093-104.
- 410 18. Rohs, R., et al., *The role of DNA shape in protein-DNA recognition*. *Nature*, 2009. **461**(7268): p.  
411 1248-53.
- 412 19. Bartlett, A., et al., *Mapping genome-wide transcription-factor binding sites using DAP-seq*. *Nat*  
413 *Protoc*, 2017. **12**(8): p. 1659-1672.
- 414 20. Lidor Nili, E., et al., *p53 binds preferentially to genomic regions with high DNA-encoded*  
415 *nucleosome occupancy*. *Genome Res*, 2010. **20**(10): p. 1361-8.
- 416 21. Su, D., et al., *Interactions of chromatin context, binding site sequence content, and sequence*  
417 *evolution in stress-induced p53 occupancy and transactivation*. *PLoS Genet*, 2015. **11**(1): p.  
418 e1004885.
- 419 22. Sammons, M.A., et al., *TP53 engagement with the genome occurs in distinct local chromatin*  
420 *environments via pioneer factor activity*. *Genome Res*, 2015. **25**(2): p. 179-88.
- 421 23. Tebaldi, T., et al., *Whole-genome cartography of p53 response elements ranked on transactivation*  
422 *potential*. *BMC Genomics*, 2015. **16**: p. 464.
- 423 24. Allen, M.A., et al., *Global analysis of p53-regulated transcription identifies its direct targets and*  
424 *unexpected regulatory mechanisms*. *Elife*, 2014. **3**: p. e02200.

- 425 25. ENCODE, *An integrated encyclopedia of DNA elements in the human genome*. Nature, 2012.  
426 **489**(7414): p. 57-74.
- 427 26. Zhong, S., X. He, and Z. Bar-Joseph, *Predicting tissue specific transcription factor binding sites*.  
428 BMC Genomics, 2013. **14**: p. 796.
- 429 27. Ponnaluri, V.K.C., et al., *NicE-seq: high resolution open chromatin profiling*. Genome Biol, 2017.  
430 **18**(1): p. 122.
- 431 28. Gudkov, A.V. and E.A. Komarova, *The role of p53 in determining sensitivity to radiotherapy*. Nat  
432 Rev Cancer, 2003. **3**(2): p. 117-29.
- 433 29. Purvis, J.E., et al., *p53 dynamics control cell fate*. Science, 2012. **336**(6087): p. 1440-4.
- 434 30. Paek, A.L., et al., *Cell-to-Cell Variation in p53 Dynamics Leads to Fractional Killing*. Cell, 2016.  
435 **165**(3): p. 631-42.
- 436 31. Sullivan, K.D., et al., *ATM and MET kinases are synthetic lethal with nongenotoxic activation of*  
437 *p53*. Nat Chem Biol, 2012. **8**(7): p. 646-54.
- 438 32. John, S., et al., *Chromatin accessibility pre-determines glucocorticoid receptor binding patterns*.  
439 Nat Genet, 2011. **43**(3): p. 264-8.
- 440 33. Hafner, A., Stewart-Ornstein, J., Purvis, J.E., Forrester, W.C., Bulyk, M.L., Lahav, G, *p53 pulses lead*  
441 *to distinct patterns of gene expression albeit similar DNA binding dynamics*. Nature Structural &  
442 Molecular biology, 2017. **In press**.
- 443 34. Langmead, B., et al., *Ultrafast and memory-efficient alignment of short DNA sequences to the*  
444 *human genome*. Genome Biol, 2009. **10**(3): p. R25.
- 445 35. Heinz, S., et al., *Simple combinations of lineage-determining transcription factors prime cis-*  
446 *regulatory elements required for macrophage and B cell identities*. Mol Cell, 2010. **38**(4): p. 576-  
447 89.

- 448 36. Trapnell, C., et al., *Differential gene and transcript expression analysis of RNA-seq experiments*  
449 *with TopHat and Cufflinks*. Nat Protoc, 2012. **7**(3): p. 562-78.
- 450 37. Kent, W.J., et al., *The human genome browser at UCSC*. Genome Res, 2002. **12**(6): p. 996-1006.
- 451 38. Buenrostro, J.D., et al., *Transposition of native chromatin for fast and sensitive epigenomic*  
452 *profiling of open chromatin, DNA-binding proteins and nucleosome position*. Nat Methods, 2013.  
453 **10**(12): p. 1213-8.
- 454 39. Martin, M., *Cutadapt removes adapter sequences from high-throughput sequencing reads*.  
455 EMBnet.journal, 2011. **17**(1): p. 10-12.
- 456 40. Zhang, Y., et al., *Model-based analysis of ChIP-Seq (MACS)*. Genome Biol, 2008. **9**(9): p. R137.
- 457 41. Crooks, G.E., et al., *WebLogo: a sequence logo generator*. Genome Res, 2004. **14**(6): p. 1188-90.
- 458 42. Zeron-Medina, J., et al., *A polymorphic p53 response element in KIT ligand influences cancer risk*  
459 *and has undergone natural selection*. Cell, 2013. **155**(2): p. 410-22.

460

461

462

463

464

465

466

467 **Figure Legends**

468 **Fig. 1: Stereotyped p53 binding across twelve cell lines.** (A) ChIP-Seq for p53 in 12 p53 wild-type cell  
469 lines. UCSC screen shots of p53 binding sites for three canonical p53 target genes are shown. (B) Motif  
470 analysis recovered a p53 motif as the single most enriched sequence. Centrality analysis showed that this  
471 motif was also centrally enriched within peaks. (C) Heatmap showing p53 binding intensity in 8742  
472 locations in the genome. Cell lines were clustered on p53 binding and resulted in lineages clustering  
473 together. (D) Comparison of p53 binding in two cancer cell lines (UACC62 and UACC257) as well as  
474 between one cancer (UACC257) and one non-cancerous cell line (RPE1). (E) Comparison of p53 binding  
475 between Nutlin3A and IR treated samples in MCF7 or UACC257 cells.

476 **Fig. 2: Genomic sequence is weakly predictive of p53 binding.** (A) The correlation between motif strength  
477 and p53 binding is shown as a function of the number of cell lines across which the peak height was  
478 averaged, box plot represent the distribution of correlations across all possible cell line combinations. (B)  
479 The degree to which p53 binding motif predicts the strength of p53 binding is shown in a box plot, with  
480 p53 binding sites binned by their motif strength. (C) The top enriched motif identified by *in vitro* ChIP.  
481 (D) UCSC screen shots of p53 binding sites, motif score, and *in vitro* p53 binding signal are shown for  
482 CDKN1A/p21, MDM2, and MDM4. (E) *In vivo* p53 binding strength is shown in a box plot, binned by *in*  
483 *vitro* p53 binding signal at each genomic site.

484 **Fig. 3: Variable p53 binding sites show cell type specific functional enrichment.** (A) Scatterplot of all  
485 8742 p53 binding sites by their average ChIP signal and coefficient of variation (CV). Highlighted in red  
486 are 'highly variable' peaks defined as having higher than expected CV relative to the peak height. Example  
487 binding sites are labeled with the associated gene names. (B) UCSC screen shots of four example 'variable'  
488 peaks. (C) Heatmap of 'variable' p53 peaks that are also nearby (<10kb) transcription start sites of genes.  
489 The intensity of each peak is normalized to the average across 12 cell lines. Cell lines and peaks were  
490 hierarchically clustered, with no grouping by lineage observed for cell lines. Groups of inflammatory and  
491 the ER associated are highlighted.

492 **Fig. 4: Basal gene expression, but not DNA damage induced gene expression, correlates with p53**  
493 **binding.** (A) Box plots of the fold change of three canonical p53 target genes 3h after IR. Each dot  
494 represents a cell line. CDKN1A/p21 is induced in all cell lines, while MDM2 and BBC3/Puma is cell line  
495 dependent. (B) Correlation of 12 cell lines by p53 target gene (77 genes) induction after DNA damage. (C)  
496 Scatter plots of p53 target genes comparing the highly correlated lung cancer lines (A549 and H460, upper)  
497 and negatively correlated lung and kidney lines (H460 and UO31, lower). (D) Boxplots showing the  
498 correlation of either basal or DNA damage induced fold change of gene expression with p53 binding at  
499 the p53 target or variable p53 binding gene sets (Fig. 3). (E) Scatterplots illustrating the relationship  
500 between basal gene expression and p53 binding across the 12 cell lines for four p53 peaks/genes (note  
501 that in many cases multiple cell lines show little gene expression or p53 binding and therefore cluster near  
502 the origin).

503 **Fig. 5 Chromatin accessibility contributes to variable p53 binding.** (A) UCSC screen shots of two p53  
504 binding sites; p53 binding in the proximity of GREB1 is found in MCF7 treated with IR, while IL1A was  
505 bound in IR treated LOXIMVI cells. ATAC-Seq data and published DNase hypersensitivity data (for MCF7,  
506 untreated) showing that IR induced p53 binding correlates with basal DNA accessibility in each cell line.  
507 (B) Scatter plot of p53 binding post IR in MCF7 compared to LOXIMVI, colored by the difference in ATAC-  
508 Seq signal  $\log_2(\text{LOXIMVI-MCF7})$  between the two cell lines. (C) Scatter plot of p53 binding in IR treated  
509 MCF7 cells compared to MCF7 treated with IR and decitabine, colored by the difference in ATAC-Seq signal  
510 between decitabine treated and untreated cells:  $\log_2(\text{decitabine-not treated})$ . (D) UCSC screen shot of  
511 region around the gene DLGAP5, showing changes in p53 binding and accessibility in the decitabine  
512 treated MCF7 cells (the new peak is indicated by an arrow). Binding of p53 in IR treated UACC62 cells at  
513 the DLGAP5 locus without decitabine treatment is also shown.

514 **Supplement**

515 Public p53 ChIP-Seq datasets

516 SRR048928, SRR048929 – U2OS cells: Actinomycin D or Etoposide treated [14]

517 SRR287798, SRR287799, SRR287800 – MCF7: Nutlin3A, RITA, 5-FU [11]

518 SRR575903, SRR575904, SRR575905 – hESC : RA or Doxorubicin [15]

519 SRR851807, SRR851807, SRR851807 -- lymphoblastoid cell lines: doxorubicin [42]

520 p53 Target Genes used in this analysis

521 This gene list is based on the list of [12] and removing genes with low read coverage in our dataset.

|           |         |         |
|-----------|---------|---------|
| CDKN1A    | HSPA4L  | ZNF337  |
| RRM2B     | ISCU    | ZNF79   |
| MDM2      | PHLDA3  | CERS5   |
| GDF15     | SLC12A4 | CSF1    |
| SUSD6     | TRAF4   | DUSP14  |
| BTG2      | CCDC90B | EPS8L2  |
| DDB2      | CES2    | FAM210B |
| GADD45A   | DYRK3   | FUCA1   |
| PLK3      | KITLG   | IER5    |
| RPS27L    | NADSYN1 | IKBIP   |
| TNFRSF10B | NTPCR   | MICALL1 |
| TRIAP1    | ORAI3   | PMAIP1  |
| BAX       | SESN2   | RAP2B   |
| BLOC1S2   | SLC30A1 | RNF19B  |
| POLH      | TM7SF3  | SAC3D1  |



|         |          |           |
|---------|----------|-----------|
| PPM1D   | TMEM68   | TNFRSF10D |
| SULF2   | ANXA4    |           |
| XPC     | APOBEC3C |           |
| AEN     | ASCC3    |           |
| ANKRA2  | BBC3     |           |
| NINJ1   | DCP1B    |           |
| PLK2    | EPHA2    |           |
| SERTAD1 | FDXR     |           |
| SESN1   | FOSL1    |           |
| TP53I3  | LIF      |           |
| CCNG1   | PGPEP1   |           |
| CMBL    | PRKAB1   |           |
| CYFIP2  | PTP4A1   |           |
| DRAM1   | TGFA     |           |
| FBXO22  | ZNF219   |           |

522 **Supplementary Figure Legends**

523 **Fig. S1: Comparison of p53 DNA binding with published p53 ChIP-Seq datasets.** Heatmap showing p53  
524 binding intensity in 8742 locations in the genome in 12 IR treated cell lines (same as Fig. 1C) as well as  
525 published datasets.

# Figure 1

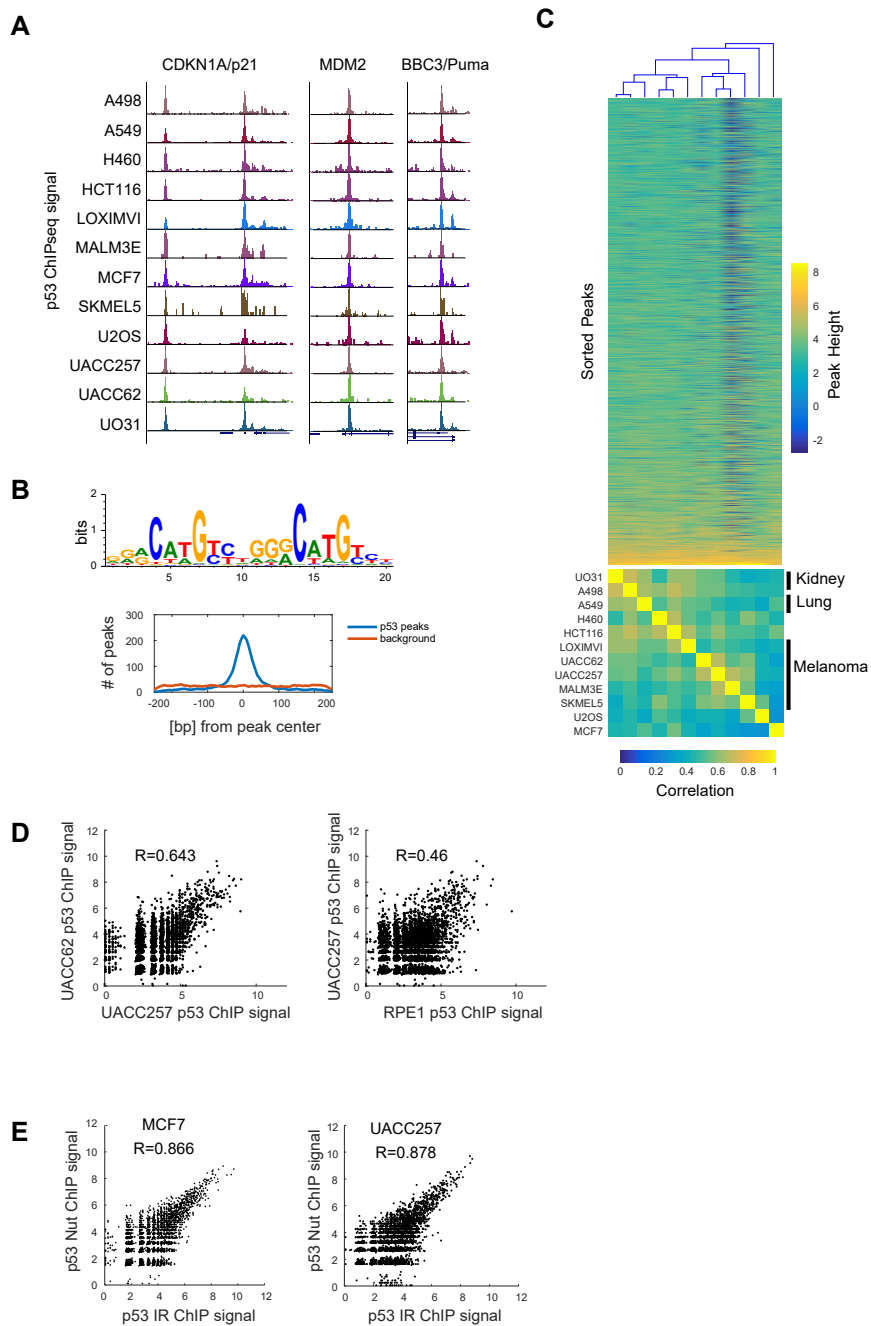



### Figure 3

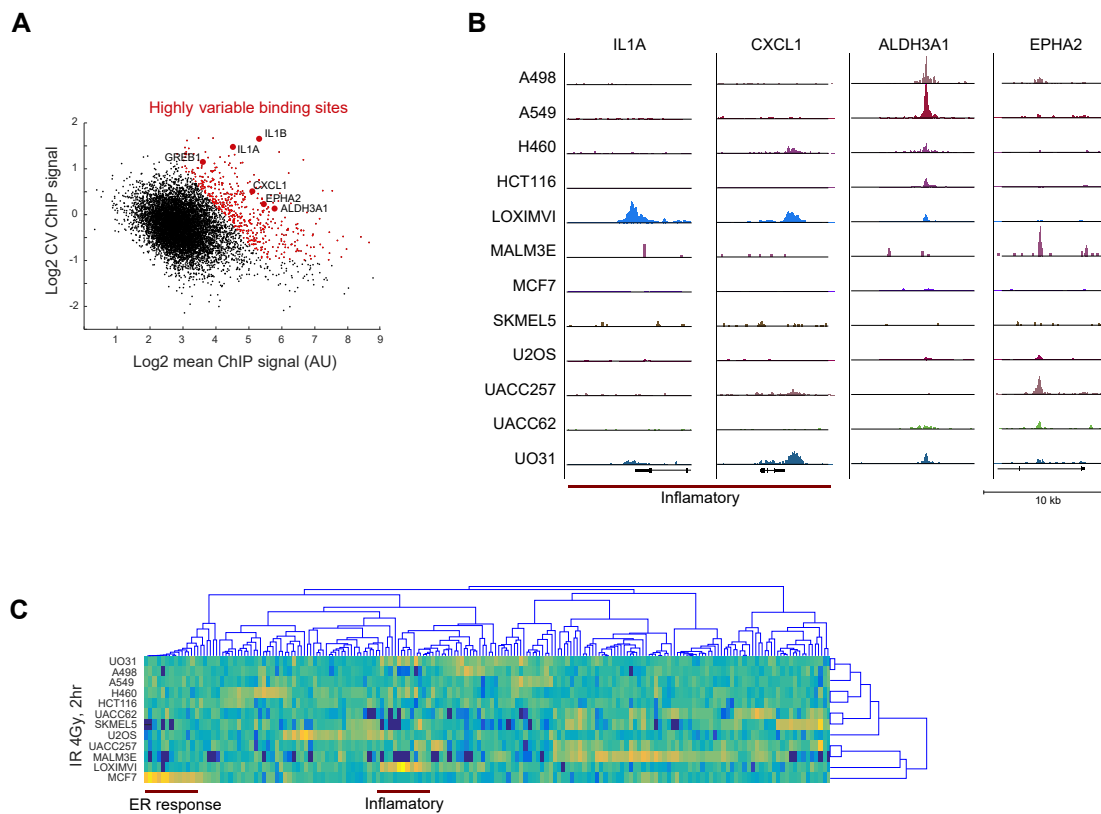

**Figure 4**

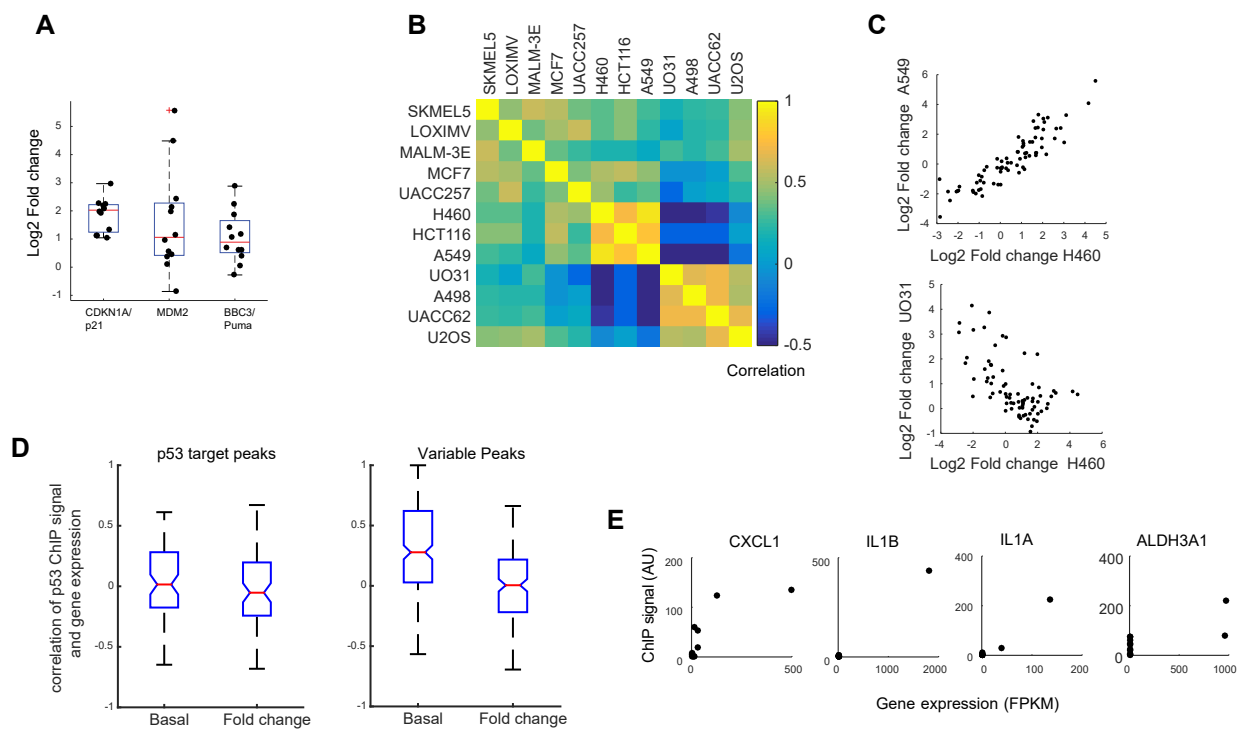

## Figure 5

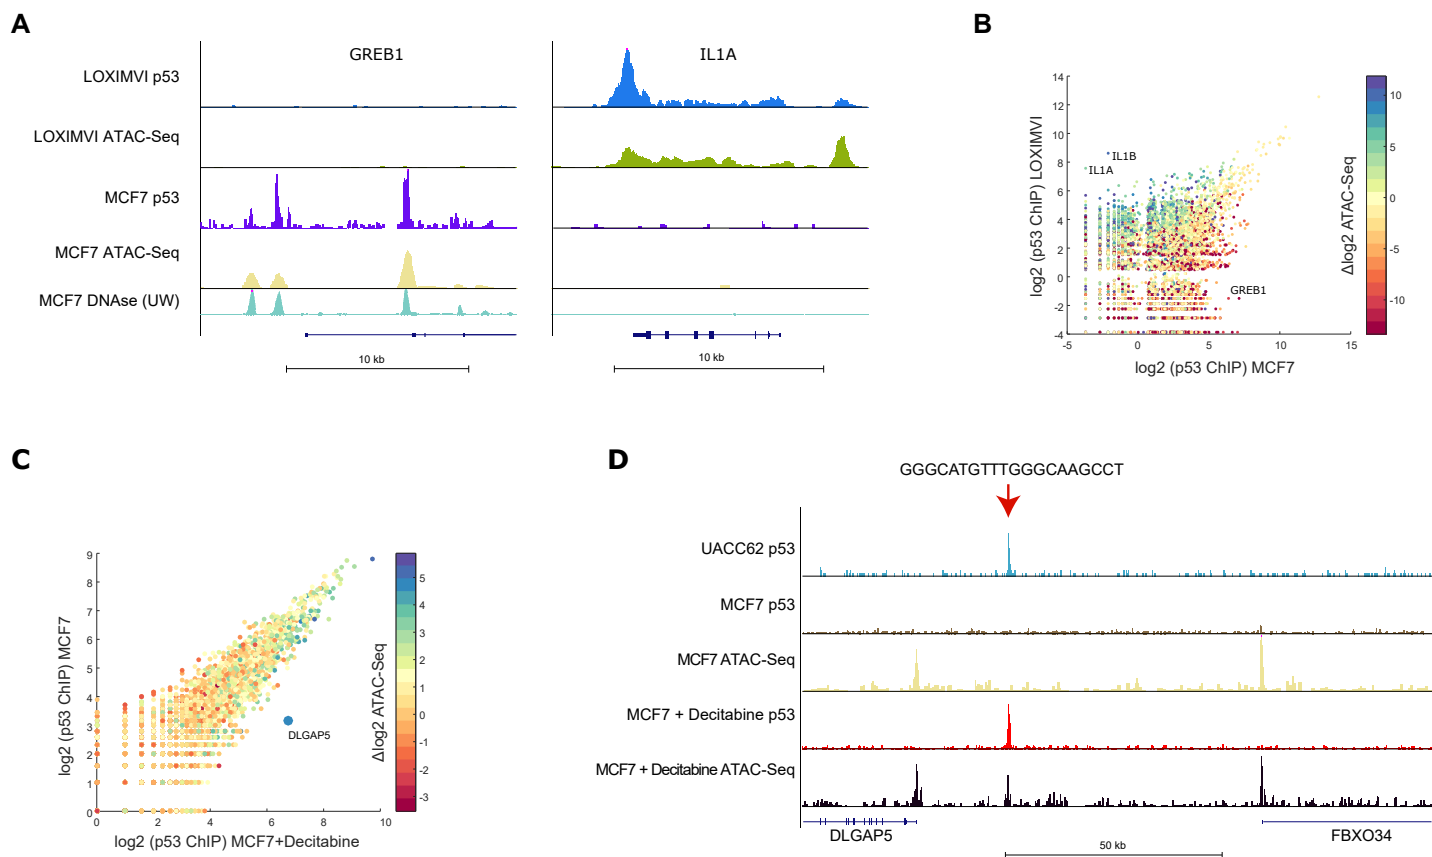

**Figure S4**

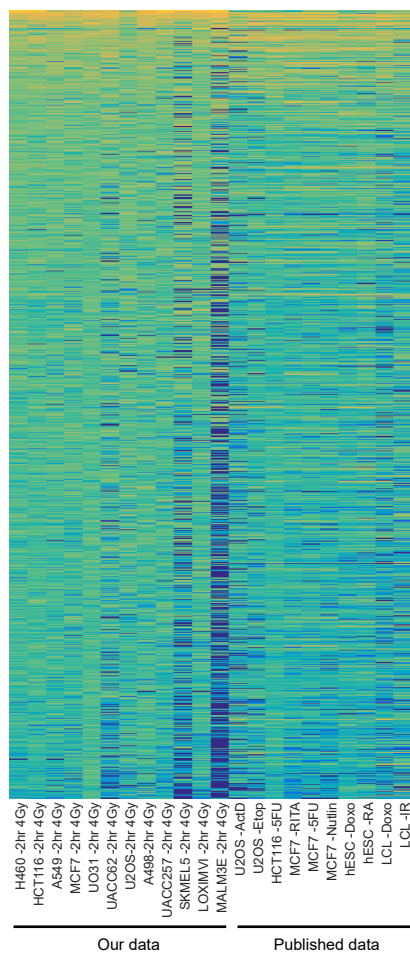

Source: http://www.biorxiv.org/content/biorxiv/early/2017/08/17/177667.full.pdf
